# Supplementary material for: Efficacy of Plant-Derived Fungicides at Inhibiting Batrachochytrium salamandrivorans Growth
Source: MDPI journal article supplement (doi:10.3390/jof8101025), 2022-09-28
Supplement: s1 [file s1]

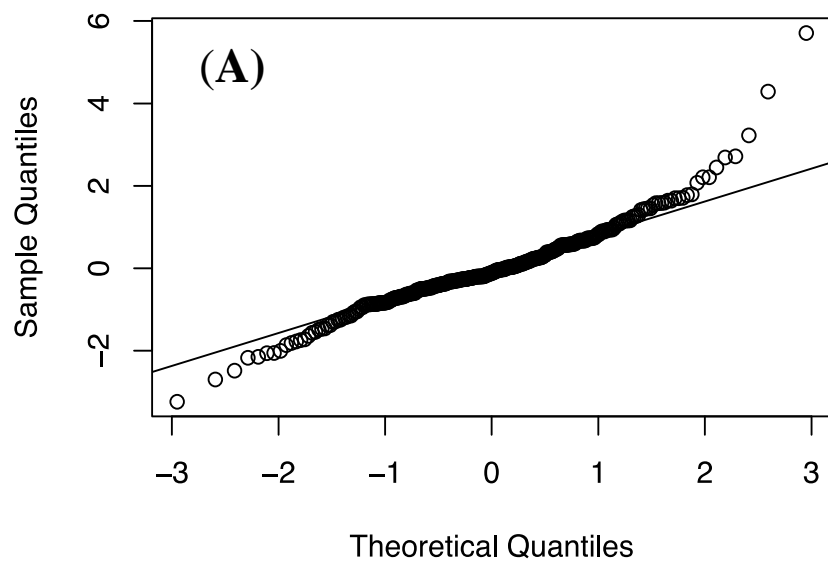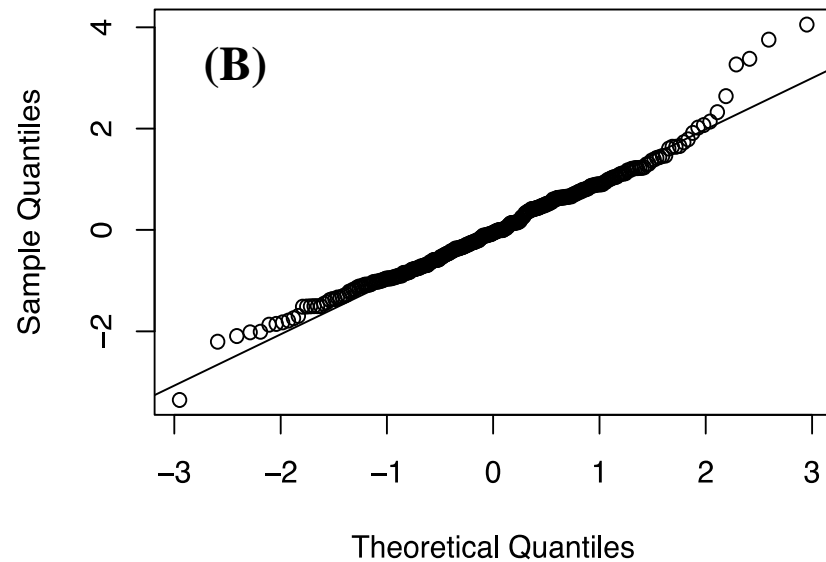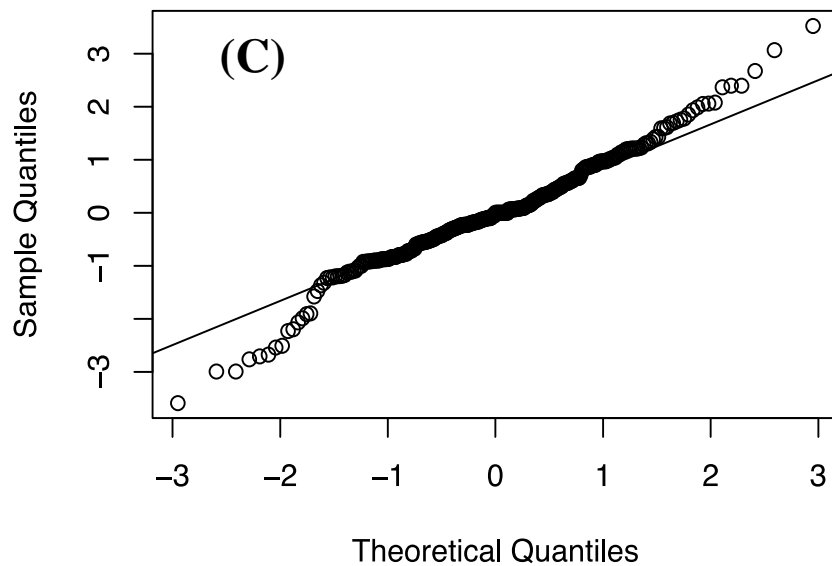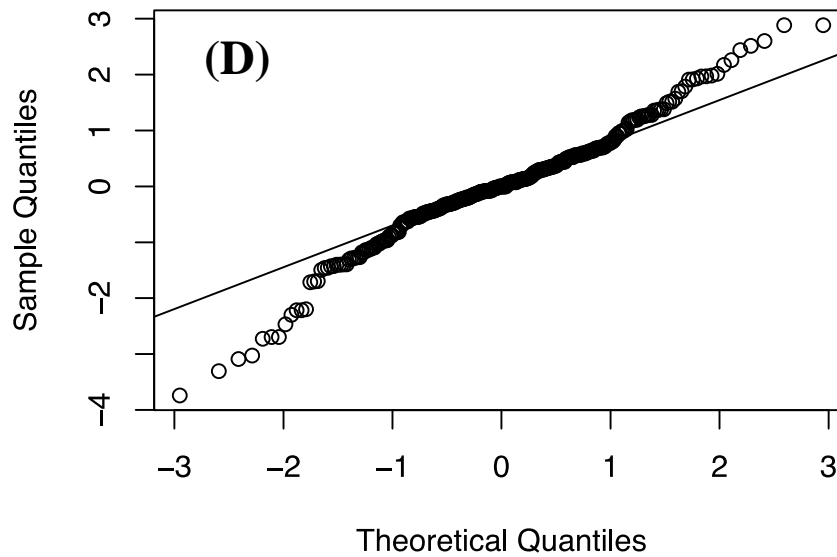

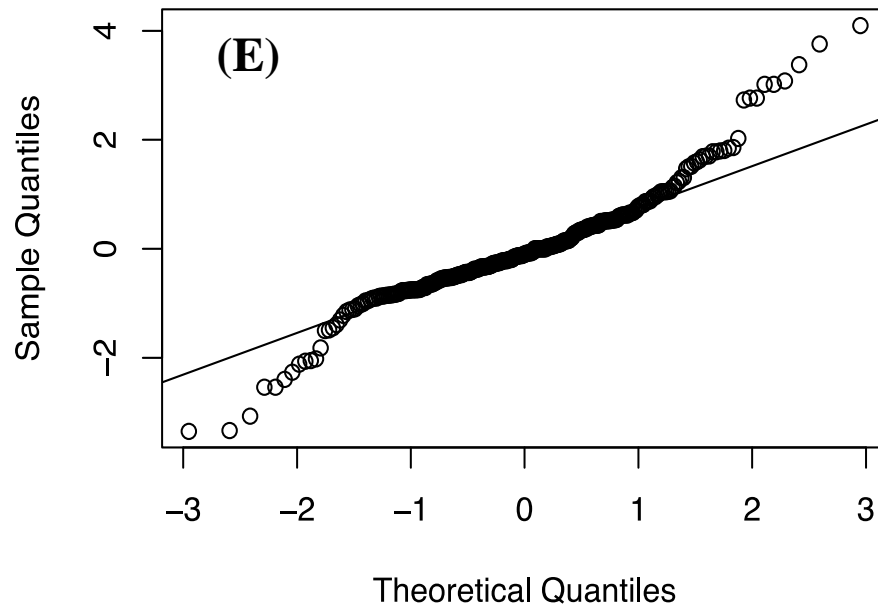

**Figure S4.** Diagnostic normal Q-Q plots for the model of best fit for each fungicide, including (A) thymol [Treatment + Plate order + Plate date], (B) curcumin [Treatment \* Plate order \* Plate date], (C) 6-gingerol [Treatment \* Plate order \* Plate date], (D) Pond Pimafix® [Treatment \* Plate order \* Plate date], and (E) Virkon® Aquatic [Treatment \* Plate order \* Plate date]. Allicin was analyzed using a binomial distribution, therefore, normality diagnostics were unnecessary, thus no normality diagnostics were performed.
