# Supplementary material for: Efficacy of Plant-Derived Fungicides at Inhibiting Batrachochytrium salamandrivorans Growth
Source: MDPI journal article supplement (doi:10.3390/jof8101025), 2022-09-28
Supplement: s1 [file s1]

**Table S1.** 95% confidence intervals for each thymol treatment concentration from the bootstrap analysis using 1000 re-sampled datasets to refit the GLS model (Treatment + Plate order + Plate date).

| 95% CI | Concentrations | Intercept | 5 ug/mL | 10 ug/mL | 15 ug/mL | 20 ug/mL | 25 ug/mL* | 30 ug/mL |
|--------|----------------|-----------|---------|----------|----------|----------|-----------|----------|
|        | 2.5%           | -0.284    | 42.091  | 18.425   | 4.980    | 1.082    | -0.456    | -0.254   |
|        | 50%            | 0.475     | 45.389  | 20.159   | 5.880    | 2.130    | 0.273     | 0.402    |
|        | 97.5%          | 1.192     | 49.252  | 22.052   | 6.810    | 3.523    | 1.102     | 1.160    |

\*The MIC (denoted with an asterisks) was determined as the lowest treatment concentration where the 95% confidence interval overlapped zero.

**Table S2.** 95% confidence intervals for each curcumin treatment concentration from the bootstrap analysis using 1000 re-sampled datasets to refit the GLS model (Treatment + Plate order + Plate date).

| 95% CI | Concentrations | Intercept | 1 ug/mL | 2 ug/mL | 3 ug/mL | 4 ug/mL | 5 ug/mL* | 6 ug/mL |
|--------|----------------|-----------|---------|---------|---------|---------|----------|---------|
|        | 2.5%           | 0.093     | 71.092  | 39.728  | 26.109  | 3.073   | -0.136   | 0.040   |
|        | 50%            | 0.590     | 81.563  | 49.489  | 33.313  | 4.428   | 0.277    | 0.467   |
|        | 97.5%          | 1.148     | 93.879  | 60.171  | 41.149  | 5.950   | 0.696    | 0.879   |

\*The MIC (denoted with an asterisks) was determined as the lowest treatment concentration where the 95% confidence interval overlapped zero.

**Table S3.** 95% confidence intervals for each 6-gingerol treatment concentration from the bootstrap analysis using 1000 re-sampled datasets to refit the GLS model (Treatment + Plate order + Plate date).

| 95% CI | Concentrations | Intercept | 5 ug/mL | 10 ug/mL | 25 ug/mL* | 50 ug/mL | 75 ug/mL | 100 ug/mL |
|--------|----------------|-----------|---------|----------|-----------|----------|----------|-----------|
|        | 2.5%           | -0.720    | 14.796  | 4.478    | -0.163    | -0.940   | -0.762   | -0.627    |
|        | 50%            | -0.162    | 17.530  | 5.668    | 0.439     | -0.303   | -0.196   | -0.032    |
|        | 97.5%          | 0.430     | 19.960  | 6.781    | 1.036     | 0.319    | 0.351    | 0.547     |

\*The MIC (denoted with an asterisks) was determined as the lowest treatment concentration where the 95% confidence interval overlapped zero.

**Table S4.** 95% confidence intervals for each Pond Pimafix® treatment concentration from the bootstrap analysis using 1000 re-sampled datasets to refit the GLS model (Treatment + Plate order + Plate date).

| 95% CI | Concentrations | Intercept | 1.95 ug/mL | 3.91 ug/mL | 7.81 ug/mL | 15.62 ug/mL | 31.25 ug/mL* | 62.5 ug/mL |
|--------|----------------|-----------|------------|------------|------------|-------------|--------------|------------|
|        | 2.5%           | -1.284    | 75.261     | 58.234     | 33.106     | 2.216       | -2.851       | -2.285     |
|        | 50%            | -0.247    | 80.438     | 68.006     | 40.102     | 3.777       | -1.786       | -1.202     |
|        | 97.5%          | 0.591     | 85.548     | 76.560     | 47.082     | 5.313       | -0.728       | -0.315     |

\*The MIC (denoted with an asterisks) was determined as the lowest treatment concentration where the 95% confidence interval overlapped zero.

**Table S5.** 95% confidence intervals for each Virkon® Aquatic treatment concentration from the bootstrap analysis using 1000 re-sampled datasets to refit the GLS model (Treatment + Plate order + Plate date).

| 95% CI | Concentrations | Intercept | 50 ug/mL | 60 ug/mL* | 70 ug/mL | 80 ug/mL | 90 ug/mL | 100 ug/mL |
|--------|----------------|-----------|----------|-----------|----------|----------|----------|-----------|
|        | 2.5%           | -0.425    | 7.489    | -0.323    | -1.039   | -1.209   | -1.341   | -1.023    |
|        | 50%            | -0.067    | 9.289    | 0.105     | -0.623   | -0.770   | -0.928   | -0.588    |
|        | 97.5%          | 0.294     | 11.558   | 0.543     | -0.258   | -0.385   | -0.485   | -0.208    |

\*The MIC (denoted with an asterisks) was determined as the lowest treatment concentration where the 95% confidence interval overlapped zero.
