# Supplementary material for: Efficacy of Plant-Derived Fungicides at Inhibiting Batrachochytrium salamandrivorans Growth
Source: J Fungi (Basel). 2022 Sep 28;8(10):1025. doi: 10.3390/jof8101025 (PMC9605044; doi:10.3390/jof8101025)
Supplement: Supplementary file 1 [file jof-08-01025-s001.zip]

Archive with 6 entries (6 files):
- Figure S1_Methanol HC.pdf
- Figure S2_MIC Plate Setup.pdf
- Figure S3_MFC Plate Setup.pdf
- Figure S4_Fungicide QQ Plots.pdf
- Tables S1_S5_Fungicide Bootstrap 95 CI.pdf
- Tables S6_S19_Fungicide MIC Results.pdf
